# Supplementary material
Source: HighWire-hosted journal article supplement (https://qualitysafety.bmj.com/content/27/4/287)
Supplement: inline-supplementary-material-1 [file inline-supplementary-material-1.docx]

**Appendix:** "Do the Stars Align? Distribution of High Quality Ratings of Healthcare Sectors Across U.S. Markets"

**Appendix Table 1:** Specific Measures of the Four CMS Star Rating Systems

| **Sector** | **Measure Domains** |
| --- | --- |
| **Hospitals** | Mortality:   - Acute myocardial infarction (AMI) - Coronary artery bypass graft surgery (CABG) - Chronic Obstructive Pulmonary Disease (COPD) - Congestive heart failure - Pneumonia - Stroke - Serious treatable complications after surgery   Safety of care:   - Central line-associated bloodstream infections (CLABSI) - Catheter-associated urinary tract infections (CAUTI) - Surgical site infections from colon surgery (SSI: Colon) - Surgical site infections from abdominal hysterectomy (SSI: Hysterectomy) - Methicillin-resistant Staphyloccocus Aureus (MRSA) events - Clostridium-difficile events - Rate of complications for hip/knee replacement - Serious complications   Hospital readmissions (30-days):   - AMI - CABG surgery - COPD - Congestive heart failure - Hip/Knee surgery - Pneumonia - Stroke - Hospital wide readmissions   Patient experience:   - Nursing communication - Doctor communication - Staff responsiveness - Pain control - Communication about medications - Cleanliness - Quietness - Discharge information - Understanding of care - Overall hospital rating - Recommendation of hospital   Effectiveness of care:   - Flu vaccination of patients - Flu vacations of staff - Aspirin within 24hrs of AMI patients - Proportion of patients who leave ED before being seen - Percentage of patients in ED with stroke symptoms who received brain scan results within 45 minutes of arrival - Percentage of patients receiving appropriate recommendation for colonoscopy screening - Percentage of patient with history of polyps receiving follow-up colonoscopy in the appropriate time frame - Percent of mothers whose deliveries were scheduled too early (1-2 weeks early) if not medically necessary - Ischemic stroke patients who got medicine to break up blood clot within 3 hours - Patients with blood clots who received anticoagulants - Patients who developed blood clots who did not receive prophylaxis   Timeliness of care   - Average (median) time patients spent in emergency department before being admitted to inpatient - Average (median) time patients spent in ED waiting to get to inpatient floor - Average (median) number of minutes before outpatients with chest pain or possible heart attack who needed specialized care were transferred to another hospital - Average (median) number of of minutes before outpatients with chest pain or possible heart attack got an ECG - Average (median) time patients spent in the ED before leaving from the visit - Average (median) time patients spent in the ED before being seen - Average (median) time patients spent in the ED with broken bones had to wait before getting pain medication   Efficient use of medical imaging   - Outpatients with low-back pain who had an MRI without trying recommended treatments first, such as physical therapy - Outpatient CT scans of the abdomen that were “combination” (double) scans - Outpatient CT scans of the chest that were “combination (double) scans - Outpatients who got cardiac imaging stress tests before low-risk outpatient surgery - Outpatients with brain CT scans who got a sinus CT scan at the same time |
| **Home Health Agencies** | Clinical process measures   - Timely imitation of care - Drug education on all medications provided to patient/caregiver - Influenza vaccine   Outcome measures:   - Improvement in ambulation - Improvement in bed transferring - Improvement in bathing - Improvement in pain interfering with activity - Improvement in shortness of breath - Acute care hospitalization rate |
| **Nursing Homes** | Health inspections:   - Nursing home survey on health deficiencies - Number of repeat revisits required to confirm correction of deficiencies   Staffing:   - Total nursing hours per resident day (RN + LPN + nurse aide hours) - RN hours per resident day   Quality measures:  Long stay residents:   - % residents whose need for help with activities of daily living has increased - % of residents whose ability to move independently worsened - % of high risk residents with pressure ulcers - % of residents who have/had a catheter inserted and left in their bladder - % of residents who were physically restrained - % of residents with a urinary tract infection - % of residents who self-report moderate to severe pain - % of residents experiencing one or more falls with major injury - % of residents who receive an antipsychotic medication   Short-stay residents:   - % of residents whose physical function improves from admission to discharge - % of residents with pressure ulcers that are new or worsened - % of residents who self-report moderate to severe pain - % of residents who newly received an antipsychotic medication - % of residents who were re-hospitalized after a nursing home admission - % of residents who have had an outpatient ED visit - % of residents who were successfully discharged to the community |
| **Dialysis Centers** | Quality measures   - Standardized mortality ratio - Standardized hospitalization ratio - Standardized transfusion ratio - % of adult patients who had enough waste removed from blood during dialysis - % of pediatric patients who had enough waste removed from blood during dialysis - % of adult peritoneal dialysis patients who had enough waste removed from blood during dialysis - % of adult dialysis patients who had hypercalcemia - % of adult dialysis patients who received treatment through fistula - % of adult patients who had a catheter left in vein for 90 days or longer for regular hemodialysis treatment |
